# Supplementary material
Source: bioRxiv or medRxiv preprint supplement (https://www.biorxiv.org/content/biorxiv/early/2019/06/05/661660/DC1/embed/media-1.pdf)
Supplement: Supplementary file [file media-1.pdf]

639 **Supplementary Figure Legends**

640 **Supplementary figure 1. Specificity controls for BG4 and TMPyP4.** a. DNase I treatment of  
641 42MGBA cells ameliorates BG4 G-quadruplex antibody staining. b,c. Treatment with 50  $\mu$ M TMPyP4  
642 (c) vs. DMSO (b) for 24 hours in 42MBGA-TMZres increases discrete punctate staining of BG4 and  
643 increased surface plot height. Nuclear surface plot of signal intensity depicted on the right was generated  
644 by FIJI. d. RNase H treatment of 42MBGA-TMZres cells ameliorates S9.6 R-loop antibody staining.

645

646 **Supplementary figure 2. Characterization of a novel CLK inhibitor (GW807982X, cdc2-like kinase**  
647 **inhibitor (CLK2i)).** a. Commercial kinase binding and activity assays were performed at Nanosyn (data  
648 included are percent inhibition at 100 nM and 1  $\mu$ M CLK2i; assays were conducted at  $[ATP] = K_m^{app}$  of  
649 each kinase), DiscoverX (data included are  $K_D$  values), and Reaction Biology Corporation (data  
650 expressed are  $IC_{50}$  values of kinase inhibition; assays were conducted at 10  $\mu$ M ATP). Differential  
651 scanning fluorimetry assays were conducted at the SGC The blue box denotes closely related family  
652 members of CLK2 within the CMGC family. Gray cells indicate that the assay was unavailable, and “nt”  
653 denotes that the compound was not tested in these assays. b. NanoBRET assay (Vasta et al., 2018) of  
654 CLK2i (CAF-022) with multiple CLK family members in live cells. c. NanoBRET  $IC_{50}$  values  
655 determined for CLK1, 2, and 4. d. Western blot of pSR changes over a time-course of CLK2i treatment  
656 in 42MGBA-TMZres cells. e. Densitometry quantification of maximal pSRSF5 hypophosphorylation in  
657 d.

658

659 **Supplementary figure 3. Controls for EWSR1 IF, aggregation, and STED imaging.** a. 42MBGA-  
660 TMZres cells stained with the mouse mAb (sc, 48404) and DAPI. b. rabbit mAb in 42MGBA, 42MBGA-  
661 72 hr 100 $\mu$ M TMZ treated, 42MBGA-TMZres, and T98G cells showing higher magnification images of  
662 cytoplasmic EWSR1 aggregation in both c. Leica Sp8 confocal, and d. STED images. Higher  
663 magnification of nuclear EWSR1 staining is shown in both e. Leica Sp8 confocal and f. STED images.

664

665 **Supplementary figure 4. Controls for EWSR1 colocalization with G4s.** Co-stain of the G4 antibody  
666 BG4 with EWSR1 in a. 42MBGA, b. 42MBGA-TMZres, c. T98G cells. The enhanced\* panels permit  
667 visualization of cytoplasmic aggregates. Merged panels show an inset with higher magnification of BG4  
668 and EWSR1 localization.

669

670

671 **Supplementary figure 5. Controls for endogenous EWSR1 depletion and nucleo-cytoplasmic**  
672 **trafficking, and ectopic YFP-EWSR1 cytoplasmic aggregation.** a. Western blot of EWSR1  
673 knockdown with four different siRNAs. b. FACS analysis of subG1 DNA content following 72 hours  
674 of EWSR1 depletion. Cell cycle profile of cells analyzed in b. for c. 42MBGA, d, 42MBGA-TMZres,  
675 e. T98G cells; three biological replicates. Treatment with 25nM Leptomycin B (CRM1 inhibitor;  
676 LMB) in f. 42MBGA, g 42MBGA-TMZres, and h. T98G cells for 24 hours. Quantification of the  
677 phenotype resulting from overexpression of YFP-EWSR1 phenotype in i. 42MBGA-TMZres n=87  
678 cells, and j. T98G n=92 cells. Representative images below for “puncta”, “nucleoli”, and “ribbon”  
679 phenotypes.

680

681 **Supplementary figure 6.** FLAIR-predicted isoforms of a. EWSR1 and d. CLK2 with representative  
682 percentage expressed in b. for EWSR1 and c. for CLK2, with cell lines denoted on the x-axis.

683
